# Supplementary material for: A Kinetic Model of Trp-Cage Folding from Multiple Biased Molecular Dynamics Simulations
Source: PLoS Comput Biol. 2009 Aug 7;5(8):e1000452. doi: 10.1371/journal.pcbi.1000452 (PMC2711228; doi:10.1371/journal.pcbi.1000452)
Supplement: Text S1 — Diffusion matrix tables and correspoding rates. (0.07 MB PDF) [file pcbi.1000452.s014.pdf]

# A kinetic model of Trp-cage folding from multiple biased molecular dynamics simulations: Text S1

Table 1: **Diffusion matrix of Ala<sub>3</sub>**. An MD trajectory of 60 ns is employed, using a time lag of 14 ps. The elements of the diffusion matrix are expressed in rad<sup>2</sup>/ps. The position dependence of the matrix and the statistical uncertainty give a total estimated error of 20%.

|          | $\phi_1$ | $\psi_1$ | $\phi_2$ | $\psi_2$ | $\phi_3$ | $\psi_3$ |
|----------|----------|----------|----------|----------|----------|----------|
| $\phi_1$ | 0.040    | 0.000    | 0.000    | 0.000    | 0.000    | 0.000    |
| $\psi_1$ | 0.000    | 0.037    | -0.018   | 0.000    | 0.000    | 0.000    |
| $\phi_2$ | 0.000    | -0.018   | -0.034   | 0.000    | 0.000    | 0.000    |
| $\psi_2$ | 0.000    | 0.000    | 0.000    | 0.034    | -0.014   | 0.000    |
| $\phi_3$ | 0.000    | 0.000    | 0.000    | -0.014   | 0.040    | 0.000    |
| $\psi_3$ | 0.000    | 0.000    | 0.000    | 0.000    | 0.000    | 0.038    |

Table 2: **Diffusion matrix of Trp-cage.** five MD trajectories for a cumulative time of 500 ns are employed, using a time lag of 12 ns. Units are 1/ns.

|            | <i>CV1</i> | <i>CV2</i> | <i>CV3</i> | <i>CV4</i> | <i>CV5</i> |
|------------|------------|------------|------------|------------|------------|
| <i>CV1</i> | 0.445      | 0.263      | 0.010      | 0.012      | -0.010     |
| <i>CV2</i> | 0.263      | 2.725      | 0.530      | 0.034      | -0.025     |
| <i>CV3</i> | 0.010      | 0.530      | 0.300      | -0.005     | -0.015     |
| <i>CV4</i> | 0.012      | 0.034      | -0.005     | 0.037      | -0.003     |
| <i>CV5</i> | -0.010     | -0.025     | -0.015     | -0.003     | 0.040      |

Table 3: **Diffusion matrix of Trp-cage close to the folded state (cluster 1).** A MD trajectory of 80 ns starting from the folded state and remaining close to it is employed, using a time lag of 12 ns. Units are 1/ns. The statistical uncertainty on each element has been calculated by dividing the overall trajectory in 3 pieces and evaluating the diffusion matrix independently in each part. The simulated T-jump experiment (see manuscript) performed using this diffusion matrix gives a relaxation time of 2322 ns

|            | <i>CV1</i>     | <i>CV2</i>   | <i>CV3</i>      | <i>CV4</i>      | <i>CV5</i>    |
|------------|----------------|--------------|-----------------|-----------------|---------------|
| <i>CV1</i> | 0.867±0.180    | -0.060±0.001 | -0.026±0.002    | 0.0009±0.0001   | -0.009±0.0003 |
| <i>CV2</i> | -0.060±0.001   | 3.027±0.474  | 0.660±0.155     | 0.010±0.002     | -0.020±0.004  |
| <i>CV3</i> | -0.026±0.002   | 0.660±0.155  | 0.343±0.045     | 0.00040±0.00003 | 0.002±0.004   |
| <i>CV4</i> | 0.0009±0.0001  | 0.010±0.002  | 0.00040±0.00003 | 0.073±0.003     | -0.005±0.002  |
| <i>CV5</i> | -0.0090±0.0003 | -0.020±0.004 | 0.002±0.004     | -0.005±0.002    | 0.028±0.003   |

Table 4: **Diffusion matrix of Trp-cage in cluster 2.** A MD trajectory of 200 ns exploring cluster 2 is employed, using a time lag of 12 ns. Units are 1/ns. The statistical uncertainty on each element has been calculated by dividing the overall trajectory in 3 pieces and evaluating the diffusion matrix independently in each part. The simulated T-jump experiment (see manuscript) performed using this diffusion matrix gives a relaxation time of 2194 ns

|            | <i>CV1</i>   | <i>CV2</i>   | <i>CV3</i>   | <i>CV4</i>   | <i>CV5</i>   |
|------------|--------------|--------------|--------------|--------------|--------------|
| <i>CV1</i> | 0.400±0.066  | 0.324±0.097  | 0.014±0.007  | 0.013±0.007  | -0.010±0.003 |
| <i>CV2</i> | 0.324±0.097  | 2.745±0.473  | 0.526±0.027  | 0.035±0.008  | -0.032±0.005 |
| <i>CV3</i> | 0.014±0.007  | 0.526±0.027  | 0.310±0.004  | -0.006±0.004 | -0.017±0.004 |
| <i>CV4</i> | 0.013±0.00   | 0.035±0.008  | -0.006±0.004 | 0.032±0.008  | -0.003±0.003 |
| <i>CV5</i> | -0.010±0.003 | -0.032±0.005 | -0.017±0.004 | -0.003±0.003 | 0.046±0.003  |

Table 5: **Diffusion matrix of Trp-cage in cluster 3.** A MD trajectory of 90 ns exploring cluster 3 is employed, using a time lag of 12 ns. Units are 1/ns. The statistical uncertainty on each element has been calculated by dividing the overall trajectory in 3 pieces and evaluating the diffusion matrix independently in each part. The simulated T-jump experiment (see manuscript) performed using this diffusion matrix gives a relaxation time of 3052 ns

|            | <i>CV1</i>   | <i>CV2</i>   | <i>CV3</i>     | <i>CV4</i>     | <i>CV5</i>     |
|------------|--------------|--------------|----------------|----------------|----------------|
| <i>CV1</i> | 0.410±0.075  | 0.320±0.068  | 0.017±0.005    | 0.023±0.001    | -0.008±0.001   |
| <i>CV2</i> | 0.320±0.068  | 1.630±0.055  | 0.500±0.080    | 0.0470±0.002   | -0.030±0.007   |
| <i>CV3</i> | 0.017±0.005  | 0.500±0.080  | 0.286±0.037    | -0.008±0.002   | -0.0222±0.0008 |
| <i>CV4</i> | 0.023±0.001  | 0.0470±0.002 | -0.008±0.002   | 0.033±0.004    | -0.0060±0.0005 |
| <i>CV5</i> | -0.008±0.001 | -0.030±0.007 | -0.0222±0.0008 | -0.0060±0.0005 | 0.036±0.002    |

Table 6: **Diffusion matrix of Trp-cage in extended states and cluster 4.** A MD trajectory of 70 ns exploring cluster 4 is employed, using a time lag of 12 ns. Units are 1/ns. The statistical uncertainty on each element has been calculated by dividing the overall trajectory in 3 pieces and evaluating the diffusion matrix independently in each part. The simulated T-jump experiment (see manuscript) performed using this diffusion matrix gives a relaxation time of 3340 ns

|            | <i>CV1</i>       | <i>CV2</i>   | <i>CV3</i>     | <i>CV4</i>     | <i>CV5</i>       |
|------------|------------------|--------------|----------------|----------------|------------------|
| <i>CV1</i> | 0.307±0.001      | 0.510±0.003  | 0.030±0.002    | 0.018±0.001    | -0.00610±0.00001 |
| <i>CV2</i> | 0.510±0.003      | 2.887±0.270  | 0.533±0.016    | 0.050±0.005    | -0.030±0.012     |
| <i>CV3</i> | 0.030±0.002      | 0.533±0.016  | 0.482±0.077    | -0.0114±0.0002 | -0.0120±0.0001   |
| <i>CV4</i> | 0.018±0.001      | 0.050±0.005  | -0.0114±0.0002 | 0.050±0.003    | -0.0064±0.0005   |
| <i>CV5</i> | -0.00610±0.00001 | -0.030±0.012 | -0.0120±0.0001 | -0.0064±0.0005 | 0.010±0.002      |

Table 7: **Diffusion matrix of Trp-cage in cluster 5 (molten globule).** A MD trajectory of 65 ns exploring cluster 5 is employed, using a time lag of 12 ns. Units are 1/ns. The statistical uncertainty on each element has been calculated by dividing the overall trajectory in 3 pieces and evaluating the diffusion matrix independently in each part. The simulated T-jump experiment (see manuscript) performed using this diffusion matrix gives a relaxation time of 2148 ns

|            | <i>CV1</i>    | <i>CV2</i>    | <i>CV3</i>         | <i>CV4</i>         | <i>CV5</i>      |
|------------|---------------|---------------|--------------------|--------------------|-----------------|
| <i>CV1</i> | 0.362±0.007   | 0.156±0.002   | 0.004±0.00006      | 0.004±0.00005      | -0.011±0.0001   |
| <i>CV2</i> | 0.156±0.002   | 2.875±0.040   | 0.541±0.010        | 0.0180±0.0002      | -0.023±0.0003   |
| <i>CV3</i> | 0.004±0.00006 | 0.541±0.010   | 0.203±0.004        | -0.000140±0.000002 | -0.0130±0.0005  |
| <i>CV4</i> | 0.004±0.00005 | 0.0180±0.0002 | -0.000140±0.000002 | 0.0270±0.0003      | 0.00151±0.00002 |
| <i>CV5</i> | -0.011±0.0001 | -0.023±0.0003 | -0.0130±0.0005     | 0.00151±0.00002    | 0.040±0.002     |
